# Supplementary material for: El sufrimiento animal y la extinción
Source: Hindawi journal article supplement (doi:10.1155/2018/7184163), 2011-01-01
Supplement: f1 [file 7184163.f1.pdf]

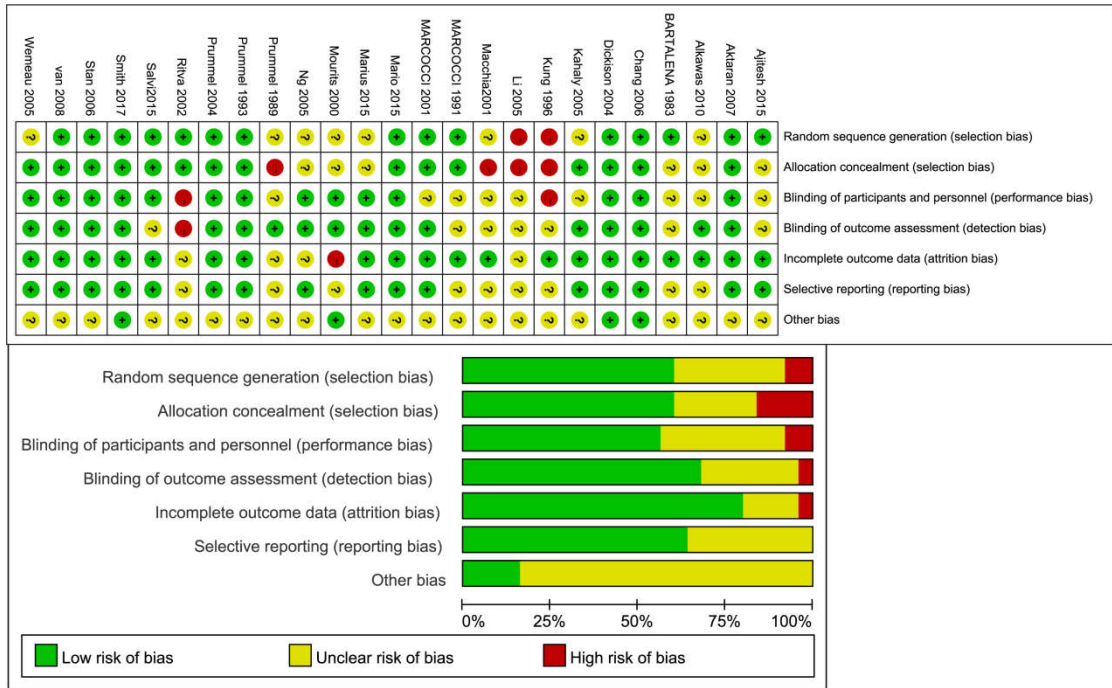

Fig.1

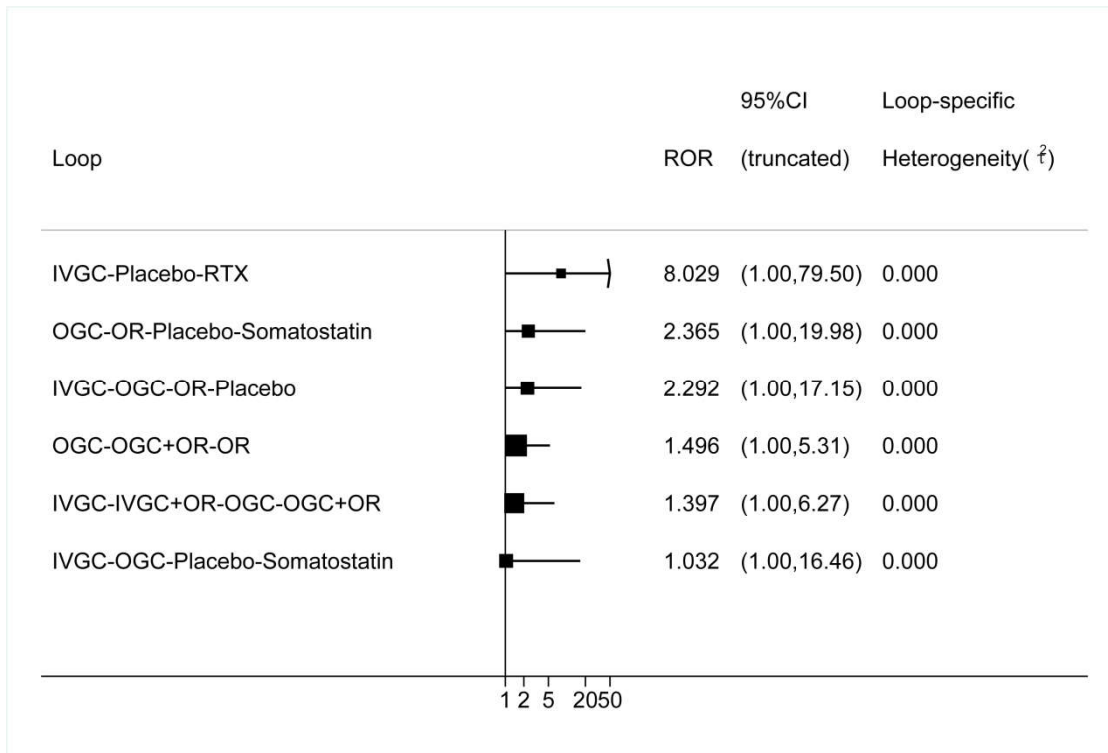

Fig. 2
